# Supplementary material for: Coding and non-coding roles of MOCCI (C15ORF48) coordinate to regulate host inflammation and immunity
Source: PubMed Central journal article supplement (PMC8035321; doi:10.1038/s41467-021-22397-5), 2021-04-09
Supplement: 41467_2021_22397_MOESM1_ESM.pdf [file 41467_2021_22397_MOESM1_ESM.pdf]

1 **Supplementary Information for**

2

3 **Coding and non-coding roles of MOCCI (C15ORF48) coordinate to regulate host inflammation**  
4 **and immunity**

5

6

7 Cheryl Q.E. Lee<sup>1</sup>, Baptiste Kerouanton<sup>2</sup>, Sonia Chothani<sup>2</sup>, Shan Zhang<sup>2</sup>, Ying Chen<sup>3</sup>, Chinmay Kumar  
8 Mantri<sup>4</sup>, Daniella Helena Hock<sup>5</sup>, Radiance Lim<sup>2</sup>, Rhea Nadkarni<sup>2</sup>, Vinh Thang Huynh<sup>3,6</sup>, Daryl Lim<sup>7</sup>,  
9 Wei Leong Chew<sup>7</sup>, Franklin L. Zhong<sup>8,9</sup>, David Arthur Stroud<sup>5</sup>, Sebastian Schafer<sup>2,10</sup>, Vinay  
10 Tergaonkar<sup>3,11</sup>, Ashley L. St John<sup>4,12,13</sup>, Owen J.L. Rackham<sup>2</sup>, Lena Ho<sup>1,2,3,\*</sup>

11

12 **This PDF file includes:**

13

14 Supplementary Figs. 1 to 10

15 Supplementary Table 1. Table containing the sequences of the primers used.

16 Supplementary Table 2. Table containing the sequences of the primers and probes used to quantify  
17 DENV and ZIKV genome.

18 Supplemental References

19

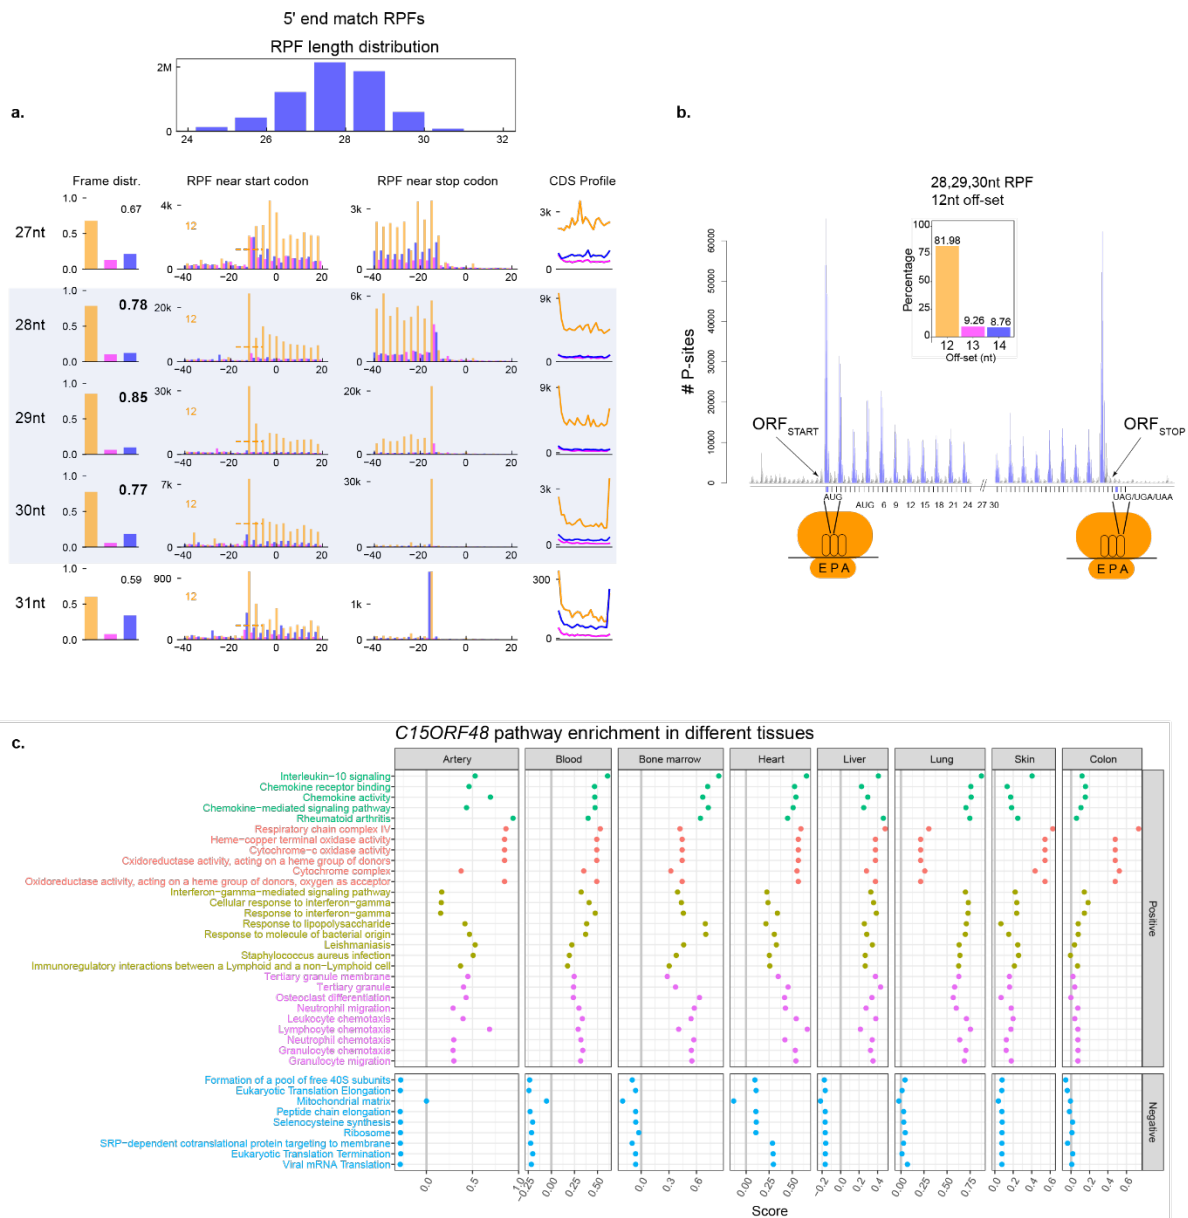

20  
21  
22  
23  
24  
25  
26  
27  
28  
29  
30  
31  
32

**Supplementary Fig. 1. Proteo-genomic screen in human endothelial cells (HAECs) identifies MOCCI as an inflammatory Mito-SEP (iMito-SEP)**

- Distribution of ribosome protected fragment (RPF) lengths in our Ribo-seq dataset. Overall periodicity and offset of each RPF length across annotated open reading frames (ORFs) were further analyzed to determine the optimal values for use in RiboTaper (i.e. 28,29,30 nt read length which showed > 75% in-frame periodicity at an offset of 12 nt).
- Cumulative distribution of P-site reads at first and last 10 codons of annotated ORFs using RPFs of 28, 29 and 30 nt. Inset shows the percentage of in-frame reads in each frame.
- Gene module association determination (G-MAD) of MOCCI in different human tissues reveal strong association with inflammation and respiratory chain function. Modules shown have the largest cumulative scores across tissues.

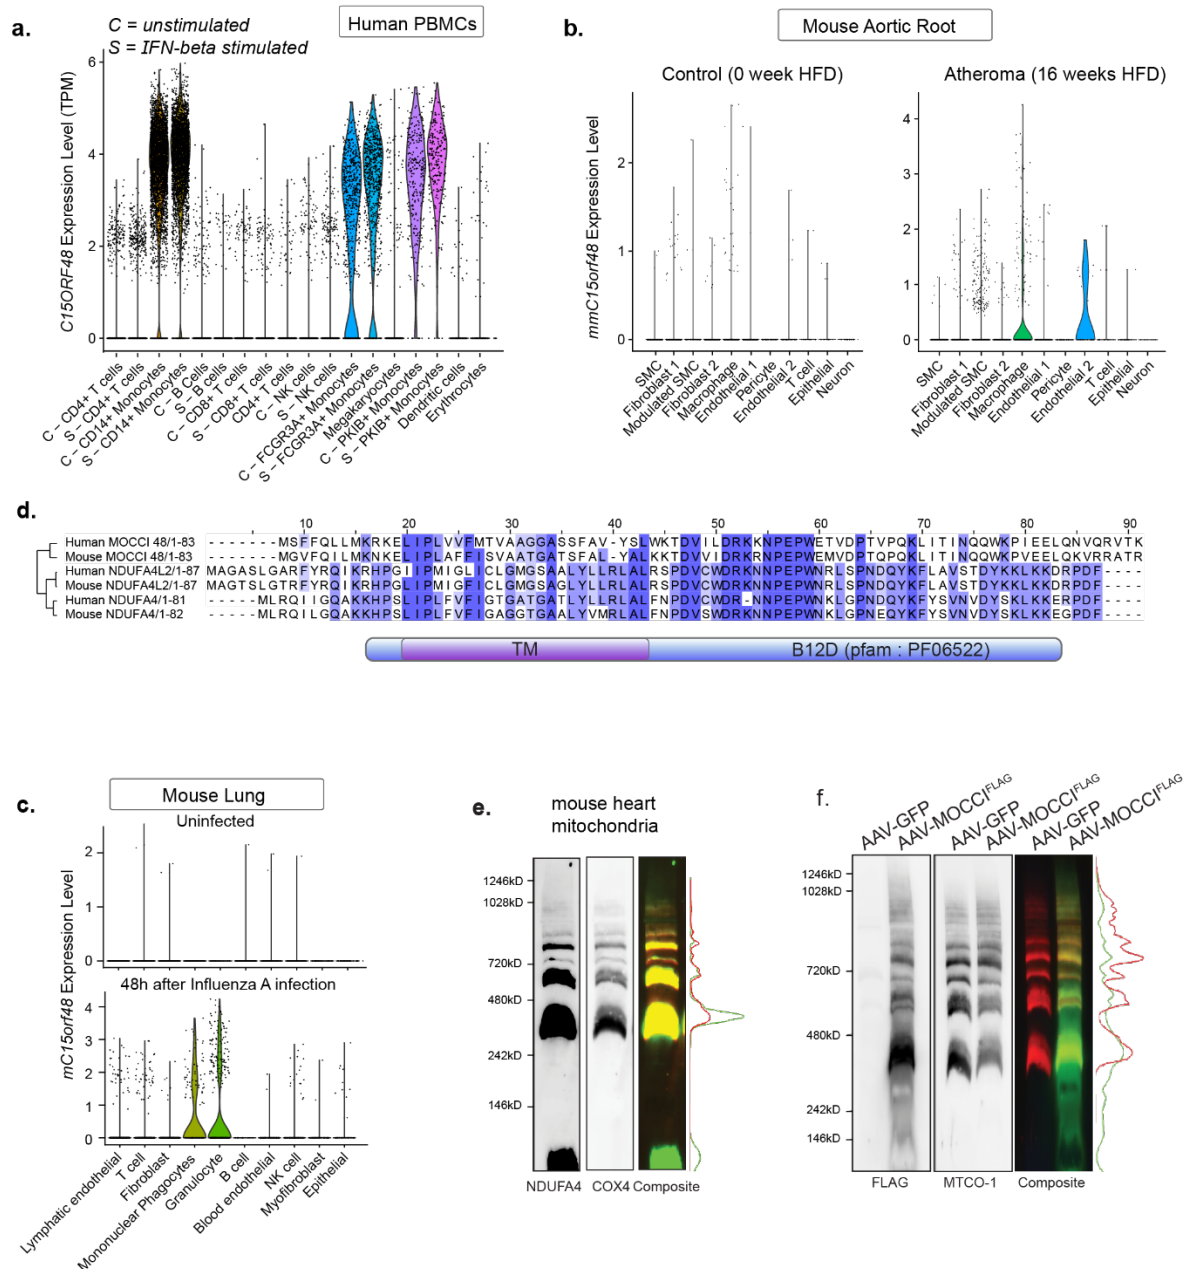

33

### 34 Supplementary Fig. 2 MOCCI is a subunit of Complex IV (Cytochrome C Oxidase)

- 35 a. Single cell RNA-seq data of untreated and interferon-treated human peripheral blood  
36 mononuclear cells (PBMCs) showing expression levels of *C15ORF48* in both unstimulated  
37 and stimulated monocytes. Data set used: [GSE96583](#)<sup>1</sup>.
- 38 b. Single cell RNA-seq data of cells isolated from an *ApoE* knockout high-fat diet (HFD)  
39 induced murine atherosclerotic model showing expression of *mC15ORF48* upregulated in  
40 macrophages, endothelial cells and modulated smooth muscle cells (SMC) in the atheroma, a  
41 region of chronic inflammation. Data set used: [GSE131776](#)<sup>2</sup>
- 42 c. Single cell RNA-seq data of cells isolated from murine lung following infection by seasonal  
43 H1N1 influenza virus showing expression of *mC15ORF48* upregulated in leukocytes as well  
44 as lymphatic endothelial cells following acute inflammation. Data set used: [GSE107947](#)<sup>3</sup>
- 45 d. Alignment of human and mouse NDUFA4, NDUFA4L2 and MOCCI peptides.
- 46 e. BN-PAGE of NDUFA4 and COX4 in mouse heart mitochondria. , *n*=4 biological replicates
- 47 f. BN-PAGE of FLAG and MTCO-1 in mouse heart mitochondria. , *n*=3 biological replicates

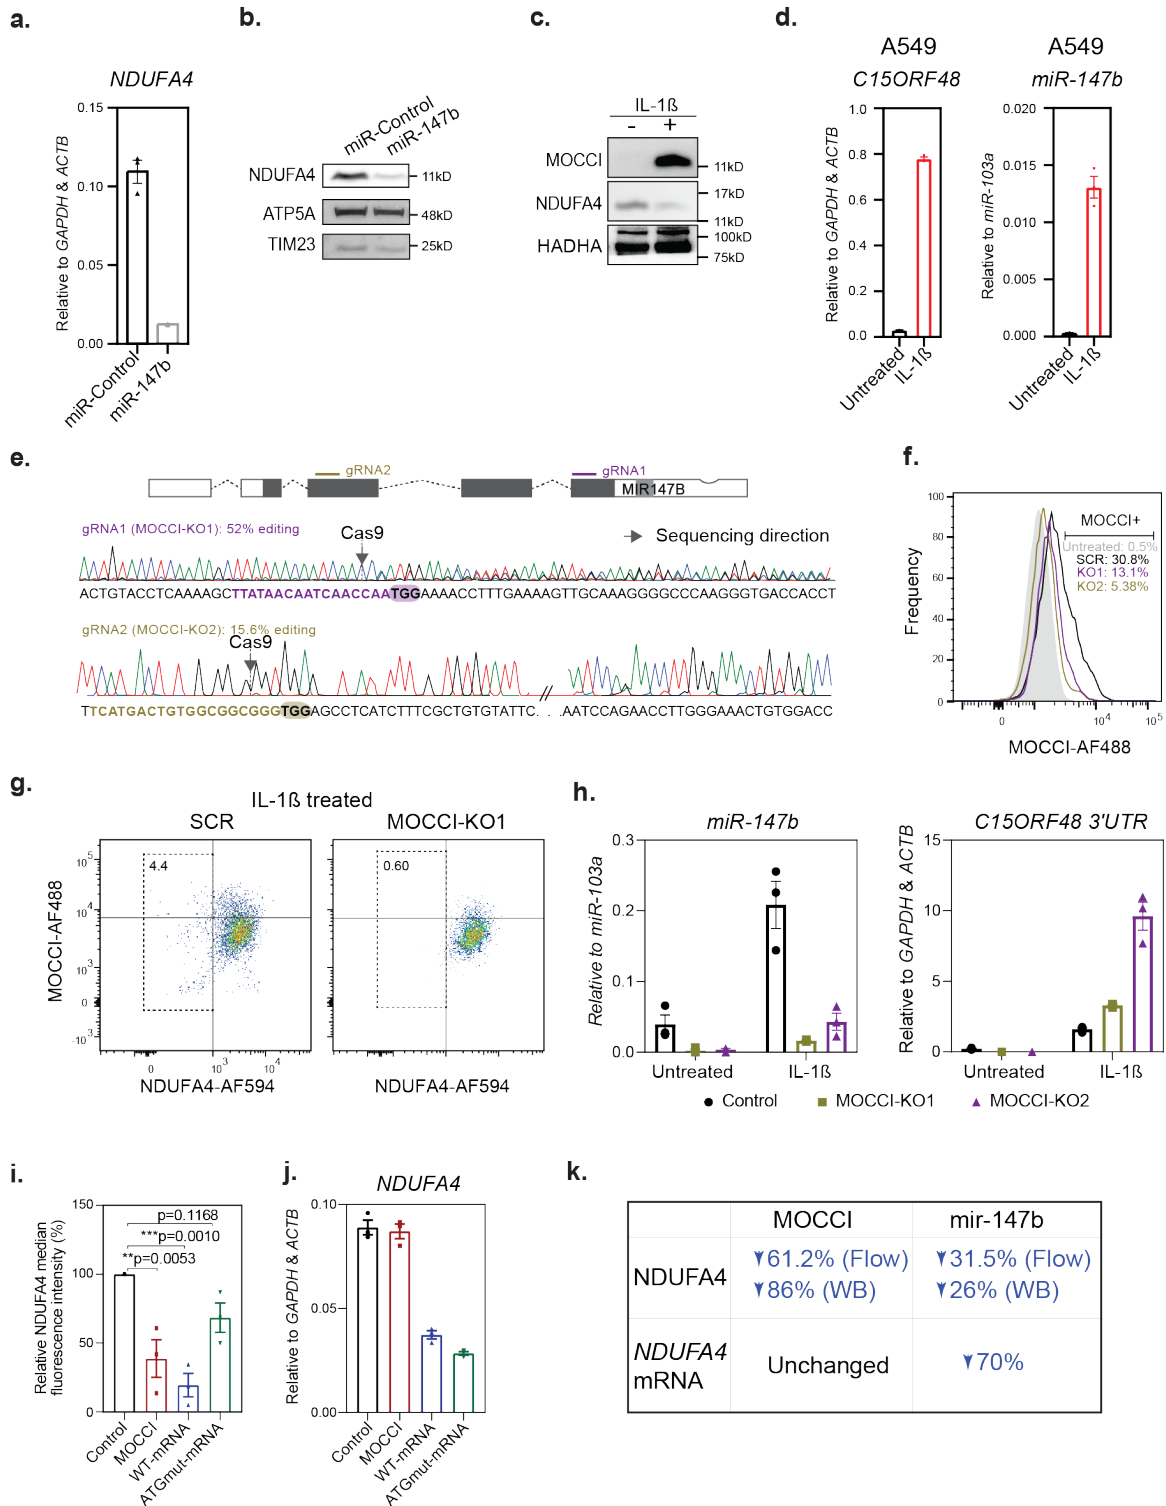

48  
49  
50  
51  
52  
53  
54  
55  
56  
57

**Supplementary Fig. 3 MOCCI and miR-147b reduce NDUFA4 expression during inflammation**

- Transfection of *miR-147b* mimic decreased *NDUFA4* transcript levels in HEK293T. Data are presented as mean  $\pm$  SEM;  $n = 3$  biological replicates per condition
- Transfection of *miR-147b* mimic decreased *NDUFA4* protein levels in HEK293T. Source data are provided as a Source Data file.
- Immunoblot of MOCCI and *NDUFA4* in mitochondria isolated from untreated and IL-1 $\beta$ -treated HAECs.  $n = 2$  biological replicates. Source data are provided as a Source Data file.
- C15ORF48* mRNA and *miR-147b* expression in untreated and IL-1 $\beta$ -treated A549 cells. Data are presented as mean  $\pm$  SEM;  $n = 3$  biological replicates per condition.

- 58 e. Schematic of Crispr/Cas9 strategy of generating *MOCCI* ORF knockout in HAECs showing  
59 position of 2 gRNAs, and chromatogram of polyclonal edited HAECs after 2 weeks of editing.  
60 Percentage of editing was estimated using TIDE<sup>4</sup>.
- 61 f. Intracellular flow cytometry staining for *MOCCI* in control (SCR) and gRNA1 (KO1) and  
62 gRNA2 (KO2)-edited HAECs following IL-1 $\beta$  stimulated induction as compared to untreated  
63 HAECs (grey).
- 64 g. Intracellular flow cytometry staining for *MOCCI* and *NDUFA4* in control (SCR) and gRNA1  
65 (KO1)-edited HAECs following IL-1 $\beta$  treatment. Dotted box indicates cells that have  
66 undergone *NDUFA4* downregulation
- 67 h. Normalized miR-147b and *C15ORF48* mRNA levels in control and KO1, KO2 HAECs at basal  
68 or following IL-1 $\beta$  stimulus to induce *C15ORF48* expression. Data are presented as mean  
69 +/- SEM; *n* = 3 biological replicates per condition.
- 70 i. Median fluorescence intensity (MFI) of *NDUFA4* collated from 3 biological replicates  
71 of data in (Fig 3f), represented as percentage of control. Data are presented as mean +/-  
72 SEM *P* = One-way ANOVA. *n* = 3 biological replicates per condition
- 73 j. Normalized *NDUFA4* mRNA levels in HAECs overexpressing the indicated transgene. Data  
74 are presented as mean +/- SEM; *n* = 3 biological replicates per condition
- 75 k. Summary of the effects of *MOCCI* and miR-147b have on *NDUFA4* protein and *NDUFA4*  
76 transcript.  
77  
78

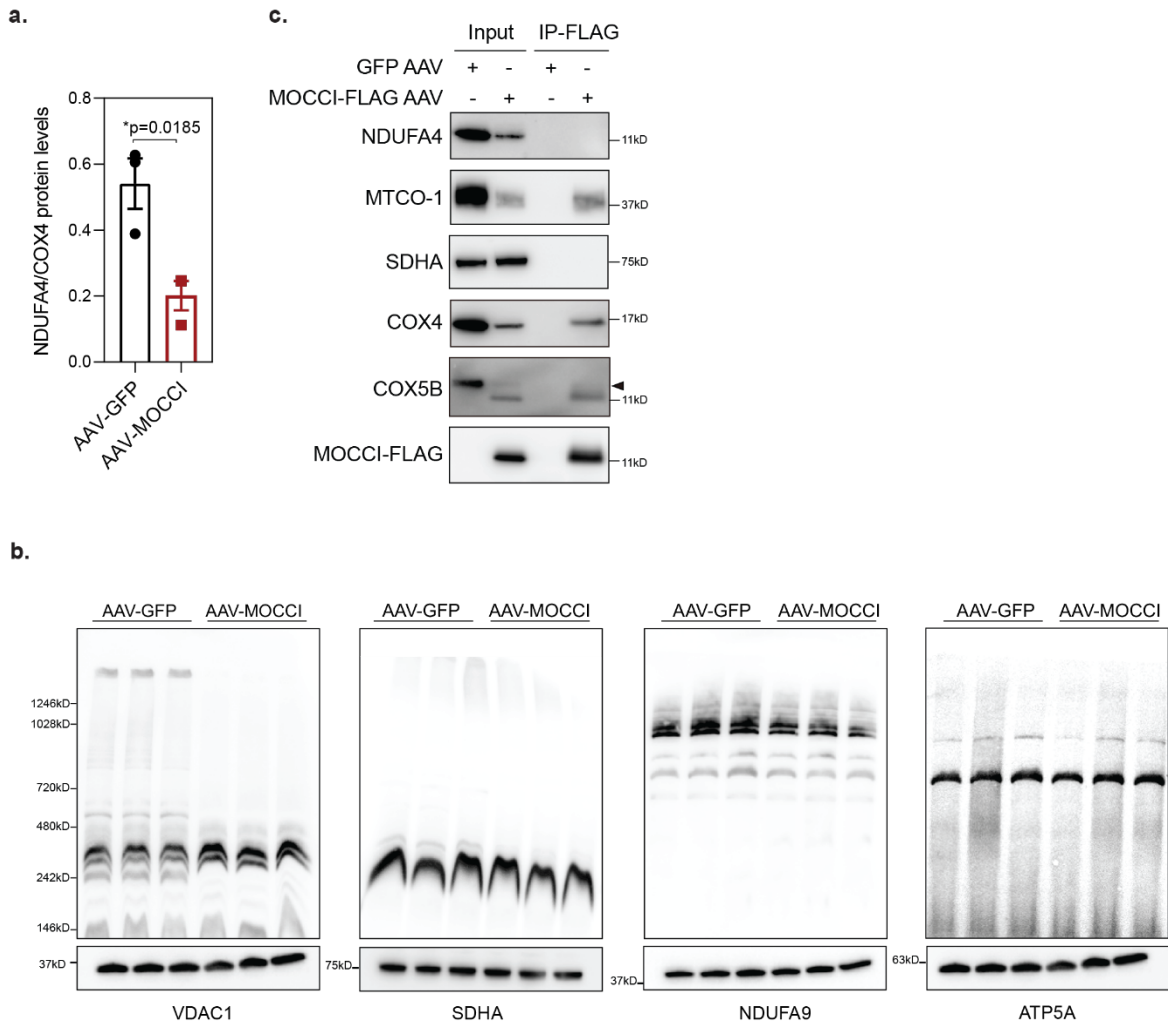

79  
80  
81  
82  
83  
84  
85  
86  
87  
88  
89  
90  
91  
92  
93

**Supplementary Fig. 4 NDUFA4 is exchanged for MOCCI in Complex IV during inflammation**

- Quantitation of NDUFA4 protein levels normalized to COX4 from Fig. 4b. Data are presented as mean  $\pm$  SEM;  $P$  = Two-tailed unpaired Student's t-test;  $n = 3$  mice per condition
- BN-PAGE (top) and SDS-PAGE (bottom) of AAV-MOCCI/GFP mouse heart mitochondria probed for the indicated respiratory chain proteins (SDHA, NDUFA9 and ATP5A). Mitochondrial protein VDAC1 acts as a loading control. Each lane represents mitochondria from one mouse.  $n=3$  biological replicates
- Co-immunoprecipitation (IP) of NDUFA4 and MOCCI in CIV monomer-enriched fractions using sucrose fractionation. Mouse heart mitochondria were immunoprecipitated with anti-FLAG and probed for the proteins as indicated. AAV-GFP served as negative control.  $n=1$  biological replicate. Source data are provided as a Source Data file.

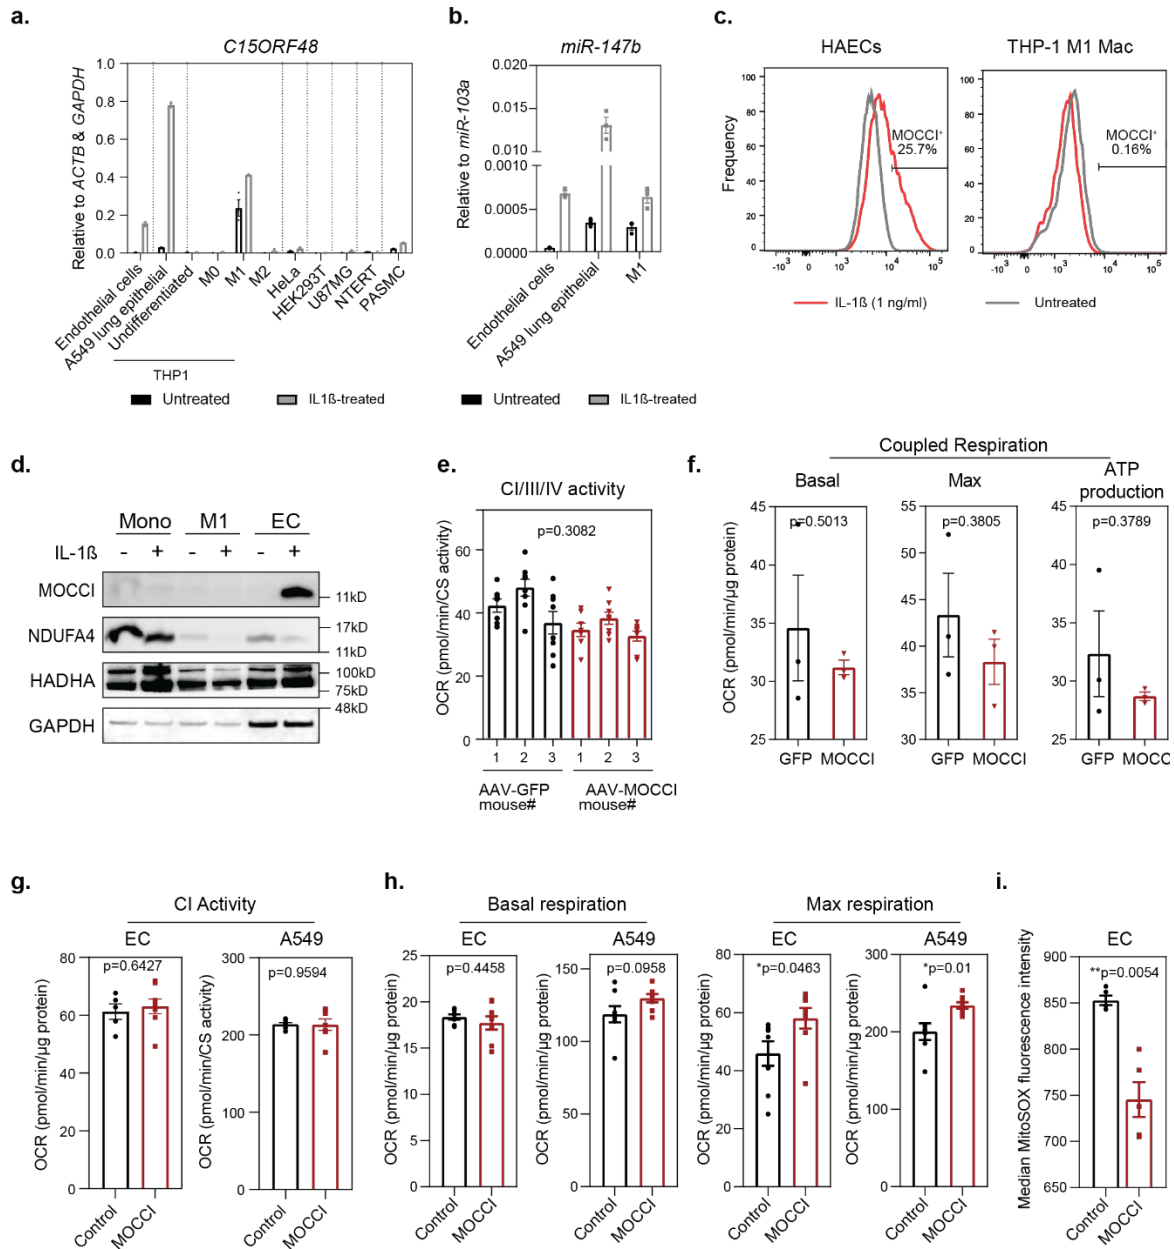

95

96

97

98

99

100

101

102

103

104

105

106

107

108

109

110

111

**Supplementary Fig. 5 MOCCI reduces CIV activity, membrane potential and ROS production**

- a. *C15ORF48* mRNA levels by qPCR in different cells at basal or treated with IL-1 $\beta$ . PASMSc = Primary pulmonary artery smooth muscle cells. Data are presented as mean +/- SEM;  $n=3$  biological replicates per condition.
- b. Normalized *miR-147b* levels by qPCR in HAECs, A549 lung epithelial and THP1 M1 macrophages at basal or treated with IL-1 $\beta$ . Data are presented as mean +/- SEM;  $n=3$  biological replicates per condition.
- c. Intracellular flow cytometry staining for MOCCI in untreated (grey line) and IL-1 $\beta$ -treated (red line) HAECs and THP-1-derived M1 macrophages.  $n=3$  biological replicates per condition.
- d. Immunoblot of MOCCI and NDUFA4 in mitochondria isolated from untreated and IL-1 $\beta$ -treated THP1 monocytes, M1 macrophages and HAECs. Results on ECs were used in Supplementary Fig. 3c.  $n=1$  biological replicate. Source data are provided as a Source Data file.

- 111 e. Uncoupled electron flow from CI to CIII to CIV using pyruvate/malate as electron donors in  
112 AAV-MOCCI and AAV-GFP isolated mouse heart mitochondria. Each column represents one  
113 mouse, and each dot represents one technical replicate. Data are presented as mean +/- SEM;  $P$   
114 = Two-tailed unpaired Student's t-test;  $n = 3$  biological replicates with 6 technical replicates  
115 each.
- 116 f. Coupled basal, max respiration and ATP production in response to pyruvate/malate in AAV-  
117 MOCCI and AAV-GFP isolated mouse heart mitochondria. Each dot represents 1 mouse and  
118 is the average of 6 technical replicates. Data are presented as mean +/- SEM;  $P =$  Two-tailed  
119 unpaired Student's t-test;  $n = 3$  biological replicates with 6 technical replicates each.
- 120 g. CI activity of permeabilized MOCCI and control cells as measured by Seahorse. Data are  
121 presented as mean +/- SEM;  $P =$  Two-tailed unpaired Student's t-test;  $n = 6$  technical replicates  
122 each
- 123 h. Basal and maximum respiration measured by Seahorse Mito-Stress™ test on MOCCI and  
124 control cells. Each dot represents one technical replicate. Data are presented as mean +/- SEM;  
125  $P =$  One-way ANOVA.  $n = 3$  biological replicates
- 126 i. Total mitochondrial ROS levels MOCCI and control cells as measured by flow cytometry of  
127 MitoSOX dye reaction. Data are presented as mean +/- SEM;  $P =$  One-way ANOVA;  $n = 3$   
128 biological replicates per condition.

129



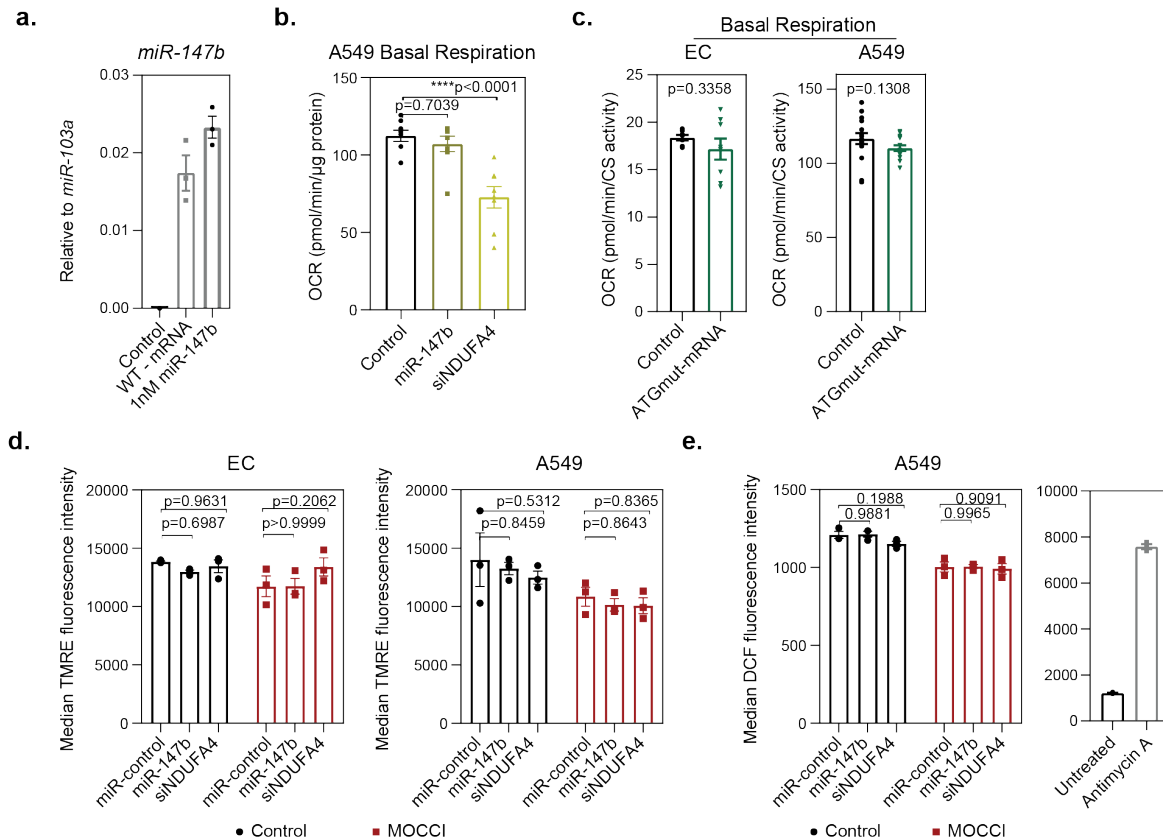

130  
131  
132  
133  
134  
135  
136  
137  
138  
139  
140  
141  
142  
143  
144  
145  
146  
147  
148  
149  
150  
151  
152

**Supplementary Fig. 6 *miR-147b* reduces CIV activity but not membrane potential and ROS production**

- Normalised levels of *miR-147b* in control cells, cells transduced with *WT-mRNA* and cells transfected with 1 nM *miR-147b* mimic. Data are presented as mean +/- SEM;  $n = 3$  biological replicates
- Basal respiration measured by Seahorse Mito-Stress™ test on A549 cells transfected with scrambled miRNA (Control), *miR-147b* mimic and (miR-147b) siRNA against *NDUFA4* (siNDUFA4). Each dot represents one technical replicate. Data are presented as mean +/- SEM;  $P =$  One-way ANOVA;  $n = 8$  technical replicates.
- Basal respiration measured by Seahorse Mito-Stress™ test on ATGmut-mRNA and control cells. Each dot represents one technical replicate. Data are presented as mean +/- SEM;  $P =$  Two-tailed unpaired Student's *t*-test;  $n = 8$  technical replicates for HAECs and 16 technical replicates over 2 repeats for A549
- Membrane potential of *miR-control*, *miR-147b* mimic or *siNDUFA4* transfected MOCCI and control cells as measured by flow cytometry of TMRE dye incorporation. Data are presented as mean +/- SEM;  $P =$  Two-way ANOVA;  $n = 3$  biological replicates per condition.
- (Left) Total cellular ROS levels of *miR-control*, *miR-147b* mimic or *siNDUFA4* transfected MOCCI and control cells as measured by flow cytometry of DCF dye reaction. (Right) DCF fluorescence intensity of control cells before and after Antimycin A treatment as a positive control. Data are presented as mean +/- SEM;  $P =$  Two-way ANOVA;  $n = 3$  biological replicates per condition.

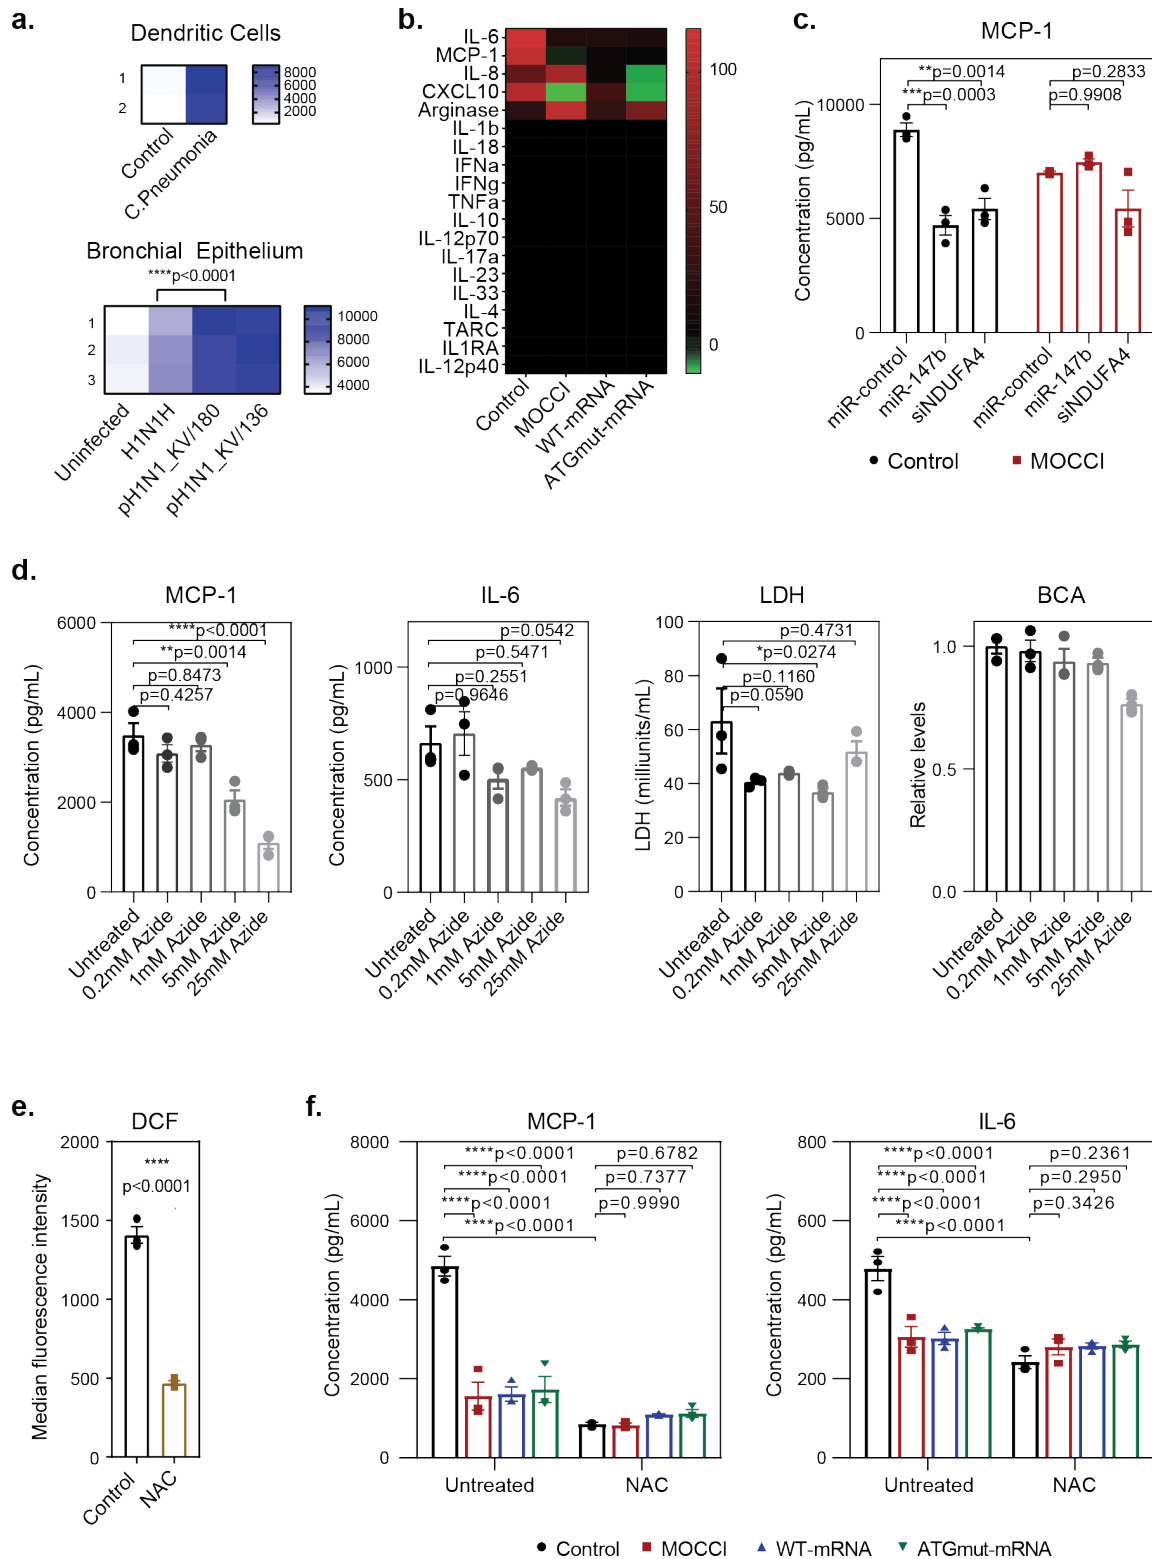

153  
154  
155  
156  
157  
158  
159  
160

**Supplementary Fig. 7 MOCCI and miR-147b reduce MCP-1 and IL-6 secretion during viral infection**

- Levels of *C15ORF48* in indicated RNA-seq datasets of bacterial and viral infection models. Data are extracted from [GSE128065](#) (dendritic cells) and [GSE484666](#) (bronchial epithelium). P = One-way ANOVA
- Heatmap of the levels of cytokines secreted by HAECs with indicated transgenes following DENV/ZIKV infection, as detected by LEGENDplex cytokine bead array.

- 161 c. Levels of MCP-1 (CCL2) secreted by MOCCI or control HAECs transfected with *miR-control*,  
162 *miR-147b* mimic or *siNDUFA4* following ZIKV infection. Data are presented as mean +/-  
163 SEM; *P* = Two-way ANOVA; *n*= 3 biological replicates per conditions.
- 164 d. Levels of MCP-1 (Left panel) or IL-6 (centre left panel) secreted by HAECs treated with  
165 indicated concentration of potassium azide. Levels of cytokines were normalized to BCA levels  
166 (right panel). (Centre right panel) Lactate dehydrogenase (LDH) levels to show minimal cell  
167 death in this assay. Data are presented as mean +/- SEM; *P* = Two-way ANOVA; *n*= 3  
168 biological replicates per conditions.
- 169 e. Total cellular ROS levels of HAECs treated with ROS scavenger NAC as measured by flow  
170 cytometry of DCF dye reaction. Data are presented as mean +/- SEM; *P* = Two-tailed unpaired  
171 Student's t-test; *n*= 3 biological replicates per condition.
- 172 f. Levels of MCP-1 (left) and IL-6 (right) secreted by HAECs with indicated transgenes with and  
173 without NAC treatment. Data are presented as mean +/- SEM; *P* = Two-way ANOVA; *n*= 3  
174 biological replicates per conditions.

175

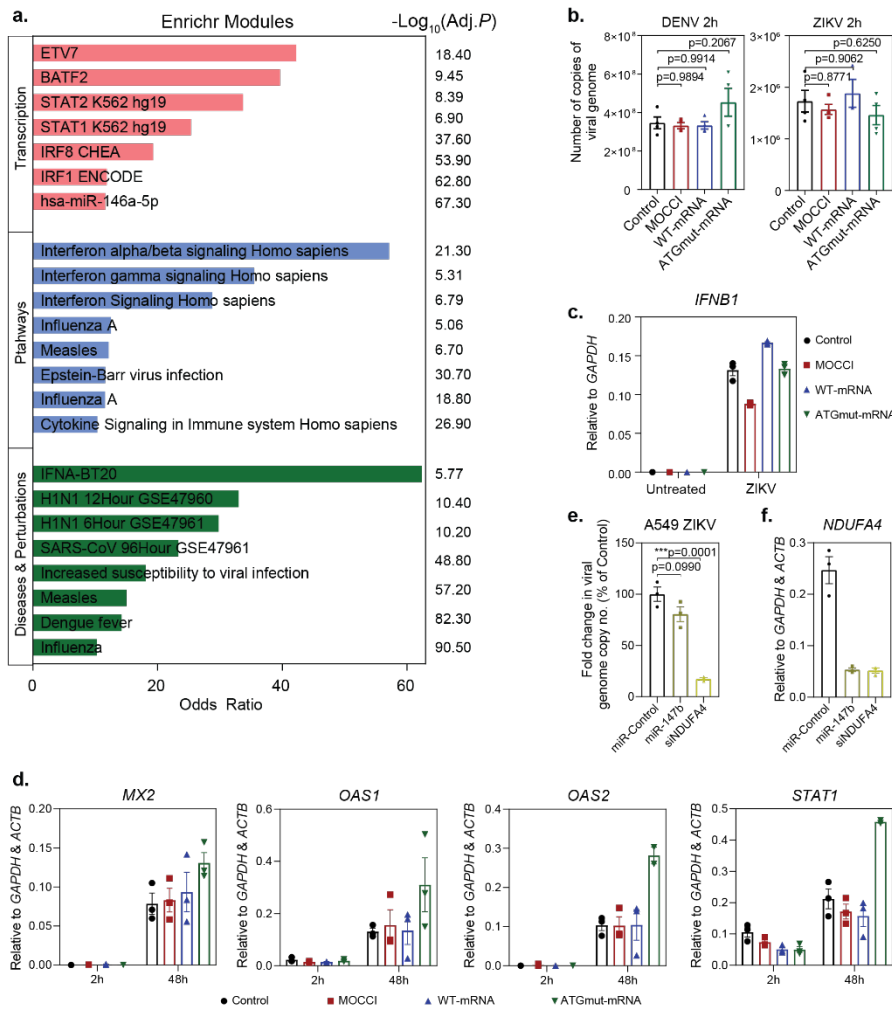

176  
177  
178  
179  
180  
181  
182  
183  
184  
185  
186  
187  
188  
189  
190  
191  
192  
193  
194  
195  
196  
197  
198  
199

### Supplementary Fig. 8 MOCCI and miR-147b co-ordinate to optimize host protection

- Description of the genes in a. vis-a-vis their transcriptional regulation, pathway membership and involvement in diseases and perturbations as revealed by the Enrichr tool (Ma'ayan lab)<sup>5,6</sup>. Significance levels for the corresponding odds ratio of significant enrichment are reported.
- HAECs with the indicated transgenes were infected with DENV and ZIKV (MOI = 1.0). 2 hours later, virus copy copy was measured by qPCR-mediated viral genome quantification as a measure of viral entry. Data are presented as mean +/- SEM; P = One-way ANOVA; n = 3 biological replicates per condition.
- Normalized *IFNB1* mRNA levels in uninfected or ZIKV-infected HAECs overexpressing the indicated transgene. Data are presented as mean +/- SEM; n = 3 technical replicates per condition.
- Normalized mRNA levels of interferon response genes in 2 h or 48 h ZIKV-infected HAECs overexpressing the indicated transgene. Data are presented as mean +/- SEM; n = 3 biological replicates per condition.
- A549 transfected with *miR-control*, *miR-147b* mimic or *siNDUFA4* were infected with ZIKV (MOI = 0.1). 48 hours later, viral replication was measured by qPCR-mediated viral genome quantification, compared to a baseline obtained at 2 hours post infection. Values are expressed as percentage of the control of each biological replicate. Data are presented as mean +/- SEM; P = One-way ANOVA; n = 3 biological replicates per condition.
- Normalized *NDUFA4* mRNA levels in A549 cells transfected with *miR-control*, *miR-147b* mimic or *siNDUFA4*. Data are presented as mean +/- SEM; n = 3 biological replicates per condition.

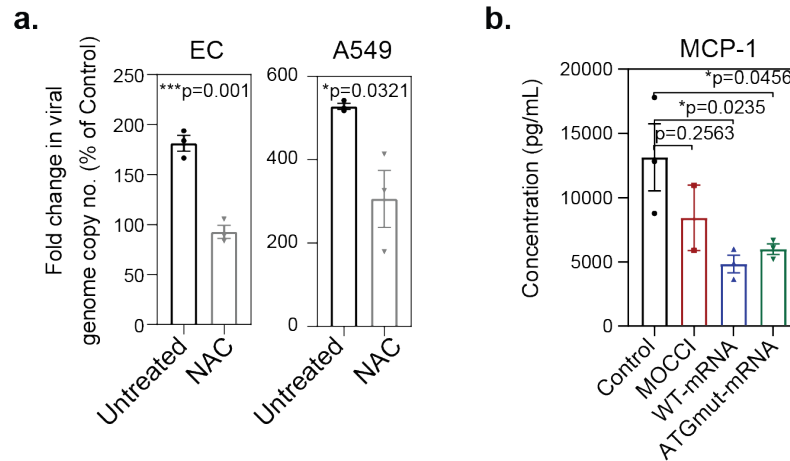

201

202 **Supplementary Fig. 9 miR-147b works through RIG-I/MDA5 pathway to**  
 203 **modulate interferon response**

204 a. HAECs or A549 treated with 1 mM NAC were infected with ZIKV (MOI =1 and 0.1  
 205 respectively). 48 hours later, viral replication was measured by qPCR-mediated viral genome  
 206 quantification, compared to a baseline obtained at 2 hours post infection. Values are expressed  
 207 as percentage of the control of each biological replicate. Data are presented as mean +/- SEM;  
 208 *P* = Two-tailed unpaired Student's t-test; *n* = 3 biological replicates per condition.

209 b. Levels of MCP-1 secreted by A549 with indicated transgenes after transfection with RIG-I  
 210 agonist. Data are presented as mean +/- SEM; *P* = Two-way ANOVA; *n* = 3 per conditions.

211

212

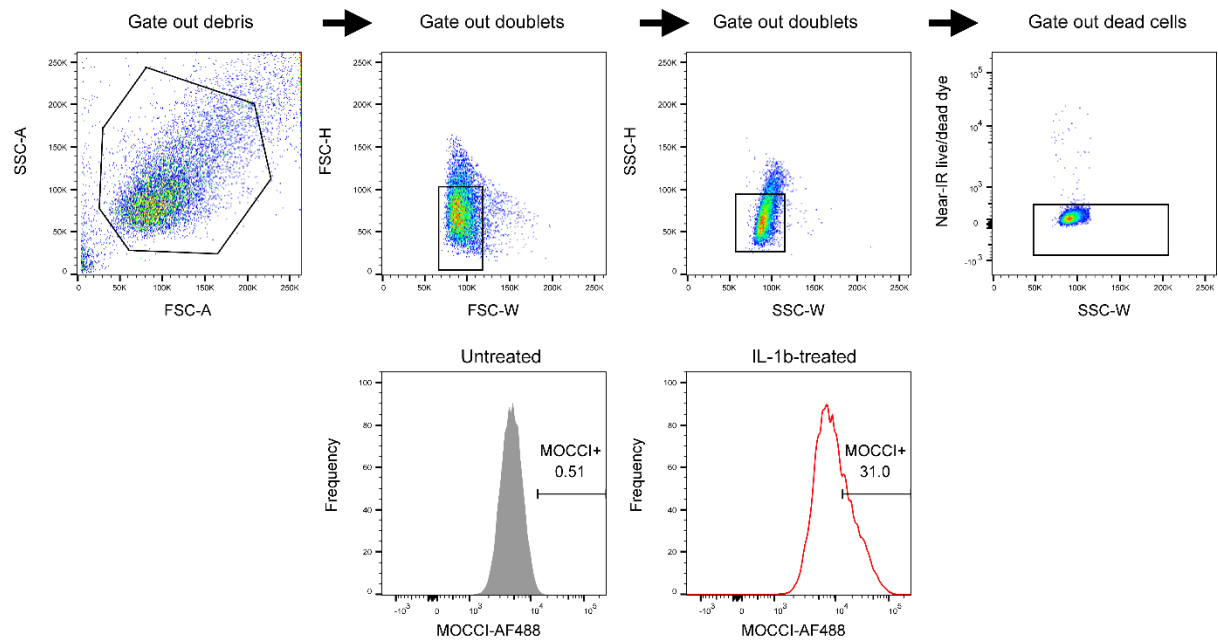

213

214 **Supplementary Fig. 10 Gating strategy for flow cytometry.** Debris, doublets and dead

215 cells were excluded before the cells were analyzed for the genes of interest. This gating

216 strategy was used for Figures 1b, 3a, 3d-f, and Supplementary Figures 3f, 3g and 5c.

217 **Supplementary Table 1. Table containing the sequences of the primers used.**

218

| <b>Gene name</b> | <b>Sequence of forward primer</b> | <b>Sequence of reverse primer</b> |
|------------------|-----------------------------------|-----------------------------------|
| ACTB             | <i>TCCCTGGAGAAGAGCTACGA</i>       | <i>AGCACTGTGTTGGCGTACAG</i>       |
| GAPDH            | <i>AATCCCATCACCATCTTCCA</i>       | <i>TGGACTCCACGACGTACTIONCA</i>    |
| C15ORF48-ORF     | <i>TGGAGCCTCATCTTTCGCTGTG</i>     | <i>GCTCGTCATTTGGTCACCCTTT</i>     |
| C15ORF48 5'UTR   | <i>TGGCAATTCTTCGCTGAAGTC</i>      | <i>ATCAAGGATCACATCGGTTTTCCA</i>   |
| C15ORF48 3'UTR   | <i>CGAGCCCTCGCCTCTTCTTCT</i>      | <i>GCATTTCCGCACACTGGTGTCC</i>     |
| IFNB1            | <i>CTTGGATTCTACAAAGAAGCAGC</i>    | <i>TCCTCCTTCTGGAAGTCTGCA</i>      |
| NDUFA4           | <i>TCCTTCCAGTCGGAGACCT</i>        | <i>GGGGGATCAAGCTCGGATG</i>        |
| MX2              | <i>AACGTGCAGCGAGCTTGTC</i>        | <i>TGGCTGTTGCTGGAAGGAAT</i>       |
| OAS1             | <i>TCTGCTGGCTGAAAGCAACA</i>       | <i>CAGTCCTTCTGCCTGTGG</i>         |
| OAS2             | <i>GAGCCAGTTGCAGAAAACCAG</i>      | <i>GCATTGTCGGCACTTTCCAA</i>       |
| STAT1            | <i>CGGCTGAATTTGGCACCT</i>         | <i>CAGTAACGATGAGAGGACCCT</i>      |

219 **Supplementary Table 2. Table containing the sequences of the primers and probes used to**  
 220 **quantify DENV and ZIKV genome.**

| Purpose             | Primer name | Sequence of primer                       |
|---------------------|-------------|------------------------------------------|
| DENV forward primer | C14A        | <i>AATATGCTGAAACGCGAGAGAAACCGCG</i>      |
| DENV reverse primer | C69B        | <i>CCCATCTCITCAIATCCCTGCTGTTGG</i>       |
| DENV probe          | VICD2C38B   | <i>AGCATTCCAAGTGAGAATCTCTTTGTCAGCTGT</i> |
| ZIKV forward primer | 1086        | <i>CCGCTGCCCAACACAAG</i>                 |
| ZIKV reverse primer | 1162c       | <i>CCACTAACGTTCTTTTGCAGACAT</i>          |
| ZIKV probe          | 1107        | <i>AGCCTACCTTGACAAGCAGTCAGACACTCAA</i>   |

221



222 **References**

223

- 224 1. Kang, H. M. *et al.* Multiplexed droplet single-cell RNA-sequencing using natural genetic  
225 variation. *Nat. Biotechnol.* **36**, 89–94 (2018).
- 226 2. Wirka, R. C. *et al.* Atheroprotective roles of smooth muscle cell phenotypic modulation and  
227 the TCF21 disease gene as revealed by single-cell analysis. *Nat. Med.* **25**, 1280–1289 (2019).
- 228 3. Steurman, Y. *et al.* Dissection of Influenza Infection In Vivo by Single-Cell RNA  
229 Sequencing. *Cell Syst.* **6**, 679-691.e4 (2018).
- 230 4. Brinkman, E. K., Chen, T., Amendola, M. & van Steensel, B. Easy quantitative assessment of  
231 genome editing by sequence trace decomposition. *Nucleic Acids Res.* **42**, e168–e168 (2014).
- 232 5. Kuleshov, M. V *et al.* Enrichr: a comprehensive gene set enrichment analysis web server 2016  
233 update. *Nucleic Acids Res.* **44**, W90–W97 (2016).
- 234 6. Chen, E. Y. *et al.* Enrichr: interactive and collaborative HTML5 gene list enrichment analysis  
235 tool. *BMC Bioinformatics* **14**, 128 (2013).
- 236
